## 15 **Abstract**

## 16 **Background**

17 Leptospirosis is an emerging zoonosis of global importance. In South Africa, the  
18 infection is an underreported public health concern, with limited information on its  
19 incidence and distribution. This study aimed to determine the incidence of human  
20 leptospirosis from 2010 to 2019 in Western Cape Province (WCP), and to compare  
21 the incidence based on seasonal and demographic factors.

## 22 **Methods**

23 A retrospective study was conducted with data on leptospirosis diagnoses by sex, age,  
24 season, and year in WCP obtained from the National Health Laboratory Services. With  
25 the provincial population sizes as the denominator, the incidence of leptospirosis was  
26 estimated and expressed as cases per 100,000 population. Negative binomial  
27 regression was used to estimate the effect of sex, season, and year on the incidence  
28 of leptospirosis.

## 29 **Results**

30 A total of 254 cases of leptospirosis were reported between 2010 and 2019, with the  
31 highest number of cases being in 2015. The annual incidence ranged between 0.15  
32 and 0.66/100,000 population with a 10-year average incidence of 0.40/100,000  
33 population. The incidence was higher among males than in females (0.55 vs. 0.25/

34 100,000 population; incidence rate ratio (IRR) 2.2, 95% CI: 1.66,3.03). The 18-44 age  
35 cohort and had the highest average incidence (0.56/100,000 population), while the  
36  $\leq 17$  age cohort had the lowest incidence (0.07/100,000 population). The 18-44 (IRR  
37 8.0, 95% CI: 4.65,15.15) and  $\geq 45$  (IRR 7.4, 95% CI: 4.17,14.17) age cohorts were  
38 more at risk of infection compared to  $\leq 17$  age cohort. The average incidence of the  
39 infection was similar among seasons and there was no significant association between  
40 season and incidence of leptospirosis.

## 41 **Conclusions**

42 The results highlight that leptospirosis is an important zoonosis within the province  
43 disproportionately affecting males and the productive age demographic groups. These  
44 findings should enhance targeted prevention and provoke further investigation on the  
45 importance of environmental and socioeconomic factors on leptospirosis burden.

## 46 **Author Summary**

47 Leptospirosis is an emerging zoonotic bacterial disease of global importance. Despite  
48 its wide distribution, the disease is largely underestimated because its clinical  
49 manifestations mimic certain commonly known febrile illnesses such as malaria,  
50 influenza, hepatitis, and yellow fever. Leptospirosis burden in South Africa has been  
51 suggested to be moderately high however studies on the burden of the infection are  
52 lacking. This study sought to determine the incidence and trends of leptospirosis in the  
53 Western Cape Province, South Africa between 2010 and 2019. Overall, leptospirosis  
54 average incidence was 0.4 cases per 100,000 population (ranging from 0.15 to 0.66  
55 cases per 100,000 population). Leptospirosis incidence was highest among male  
56 individuals and among those who were aged 18-years and above, however, the  
57 incidence did not differ by seasons. These estimates highlight that leptospirosis is an  
58 important zoonotic disease within the province and potentially disproportionately  
59 affecting males and productive age demographic groups. Therefore, this indicates the  
60 need for an all-encompassing One Health Approach to obtain all relevant information  
61 concerning leptospirosis distribution and risk factors in South Africa and in Africa at  
62 large to effectively enhance leptospirosis prevention strategies.

## 63 1. Introduction

64 Leptospirosis is an emerging, global zoonosis with an estimated 1.03 million cases  
65 and 58,900 deaths occurring annually [1–5]. The disease is caused by pathogenic  
66 spirochetes *Leptospira* species currently reported to comprise 66 different species with  
67 more than 300 serovars [6]. The infection in humans is associated with varying clinical  
68 manifestations ranging from a mild self-limiting febrile illness to severe illness  
69 characterized by dysfunction of multiple organs such as liver, kidneys, lungs, and the  
70 brain [7] potentially leading to pulmonary hemorrhagic syndrome and acute kidney  
71 injury due to Weil's disease [5,8–10] . In addition, leptospirosis presents with  
72 symptoms that can mimic commonly known infections that cause febrile illnesses such  
73 as malaria, influenza, hepatitis, yellow fever, and viral hemorrhagic diseases among  
74 others [11,12]. Consequently, the infection has often been underdiagnosed and  
75 underreported [11]. Despite the life-threatening nature of leptospirosis, there is little  
76 published data on morbidity associated with the infection [4,5,13] contributing to its  
77 neglected status.

78 The risk of leptospirosis infection among humans occurs either through direct  
79 exposure to urine or aborted tissues of wild or domestic reservoir animals such as  
80 rodents and livestock/pets [4,14], or through indirect exposure such as contact with  
81 contaminated water, soil, and food [3,14]. In South Africa, a recent prison outbreak of  
82 leptospirosis was associated with exposure of inmates to rat urine in an overcrowded  
83 prison. Due to the predominant modes of transmission, leptospirosis is regarded as  
84 an occupational hazard affecting mainly farmers, sewer workers, veterinarians, and  
85 military personnel [11,15–18]. However, the transmission patterns are changing

86 because there are increasing reports of leptospirosis in the general population. These  
87 cases are due to recreational exposures such as camping, kayaking, adventure  
88 travelling, hiking, cave exploration and other activities done in infected water  
89 [11,16,18,19]. Due to the diverse avenues through which humans can be exposed to  
90 the leptospires, occurrence of leptospirosis within the general population requires  
91 consideration [7,20].

92 Globally, tropical regions as well as resource limited settings are reported to have a  
93 higher burden of leptospirosis compared to temperate regions [5]. However, in Africa,  
94 few countries have data and reports on human leptospirosis [15,20] and research  
95 studies are scarce [2,5]. A previously published systematic review, of peer reviewed  
96 studies conducted in Africa, reported a prevalence of acute human leptospirosis  
97 ranging from 2.3% to 19.8% among hospital patients presenting with febrile illness and  
98 an estimated total of 750,000 cases per annum [15]. It was further concluded in this  
99 study that the morbidity of human leptospirosis in Africa is likely to be high relative to  
100 other global regions [15]. The need of more studies on the occurrence of leptospirosis  
101 in Africa was emphasized in another systematic review by De Vries et.al [20] to reliably  
102 understand the extent of the problem.

103 The incidence of human leptospirosis in South Africa has been suggested to be  
104 moderately high within the population [21–23]. Findings about the continued  
105 circulation of highly pathogenic *Leptospira* spp. among rodents suggests that the  
106 infection maybe an important underreported public health concern in the country  
107 [21,22]. A study conducted between 2009 and 2011 reported a seroprevalence that  
108 ranged from 9% to 12.5% among all clinical samples sent to the NHLS for IgM ELISA

109 testing from all over the country [23]. Environmental conditions in Western Cape South  
110 Africa, (the coastal, and temperate conditions with wet winters and warmer summers)  
111 have been suggested to favor transmission of pathogenic *leptospira* species *L.*  
112 *borgpetersenii* and *L. interrogans* traditionally associated with rats [4,21,22]. The most  
113 recent retrospective study conducted between 2005-2015, focused on patients  
114 presenting at a tertiary referral hospital in Western Cape Province (WCP), and a  
115 seroprevalence of 20% was reported [24].

116 Studies outside Africa have highlighted the influence of season, gender and age on  
117 the distribution and occurrence of human leptospirosis [25–27]. Such associations  
118 have scarcely been studied in Africa despite changes in climatic factors, demographic  
119 shifts, urbanization, and globalization [2,11,20,28–30]. The risk conferred by rodent  
120 infestation and overcrowding have been demonstrated in a recent leptospirosis  
121 outbreak that occurred in a prison in WCP, South Africa. [22]. Despite this information,  
122 studies describing leptospirosis occurrence in relation to demographic and seasonal  
123 factors are lacking in WCP.

124 To address these knowledge gaps, a retrospective study on human leptospirosis  
125 cases in the WCP, South Africa was conducted using data generated from diagnostic  
126 tests done in a public health care setting in Cape Town, South Africa. The study aimed  
127 at determining the incidence and trends of human leptospirosis over a 10-year period  
128 (2010-2019), with respect to year and seasonality and to describe the demographic  
129 characteristics of leptospirosis cases.

## 130 **2. Methods**

### 131 **2.1 Study setting**

132 WCP is located on the south-western coast of South Africa and is bordered by the  
133 Northern Cape and Eastern Cape Provinces. WCP has a population of approximately  
134 seven million inhabitants [31], three quarters of whom use public-sector healthcare  
135 services [32]. The province is approximately 129,462 km<sup>2</sup> and has a population density  
136 of 45 inhabitants per Km<sup>2</sup> [31]. Administratively, the province is divided into one  
137 metropolitan municipality (City of Cape Town) and five district municipalities (Central  
138 Karoo, Garden Route, Overberg, West Coast and Cape Winelands) [31]. The province  
139 has a diverse climate but is dominated by a Mediterranean climate with a cool, wet  
140 winter and a warm, dry summer. The inland daily maximum temperatures range from  
141 20 °C in winter to 32 °C in summer and the mean annual rainfall is less than 380 mm.

### 142 **2.2 Study design and study population**

143 A retrospective study was conducted by using data provided by the data warehouse  
144 of the National Health Laboratory Services (NHLS), on all human leptospirosis tests  
145 conducted at public healthcare facilities in the WCP, South Africa. The NHLS does  
146 serological testing on all serum samples of patients who are clinically suspected to be  
147 having a leptospirosis infection. Specimens from suspected patients are collected from  
148 different public healthcare facilities within the province and sent to a central NHLS  
149 laboratory in Cape Town. In this analysis, data included are from patients who had  
150 laboratory confirmed leptospirosis between 1<sup>st</sup> January 2010 and 31<sup>st</sup> December 2019.



## 151 **2.3 Data collection**

152 Human leptospirosis cases were considered for all ELISA IgM serological tests that  
153 were positive for Leptospirosis during the study period (2010 to 2019). ELISA IgM  
154 testing is the serological test conducted on all samples submitted to NHLS for  
155 leptospirosis screening and is sensitive in detecting new onset of illness [11]. Patient  
156 data extracted included the patient's age, sex, year, date of test (year, month, and  
157 day) and the name of the health facility that submitted the specimen for testing.

158 The population sizes based on year, sex, and age in WCP for the 10-year period were  
159 extracted from the Western Cape Department of Health population circular H102 of  
160 2020 [33]. This data was used as the denominator when calculating the incidence of  
161 leptospirosis infection.

## 162 **2.4 Statistical analysis**

163 All human leptospirosis cases were tabulated according to sex, age, season, and year  
164 of occurrence (2010-2019) and their frequency and proportions were calculated. The  
165 cases were not grouped based on their geographical location (district municipality)  
166 because the patient address information was not part of received data. Furthermore,  
167 the location of the health facility that submitted the specimen could not be assumed to  
168 be the same as the patient's location because of the possibility of patients seeking  
169 healthcare or being hospitalized in a facility outside of their actual district of residence.  
170 The date when the test was done was used to assign the case to a particular year and  
171 season. Season was categorized as Summer (1<sup>st</sup> December-28/29<sup>th</sup> February),

172 Autumn/Fall (1<sup>st</sup> March-31<sup>st</sup> May), Winter (1<sup>st</sup> June-31<sup>st</sup> August), and Spring (1<sup>st</sup>  
173 September-30<sup>th</sup> November). The variable year was conceptualized as a consecutive  
174 12-month period from 1<sup>st</sup> January to 31<sup>st</sup> December, thus there were ten categories for  
175 year (2010 to 2019).

176 The incidence proportion of human leptospirosis for each year (2010-2019) was  
177 estimated and expressed as leptospirosis cases per 100,000 population. The  
178 incidence proportion by sex and age group as well as for each season of the year was  
179 also estimated. The Kruskal-Wallis Rank Sum Test was used to compare the average  
180 annual incidence between seasons of the year, age groups and between years. The  
181 Wilcoxon Rank Sum Exact Test was used to compare the average annual incidence  
182 between sex demographics. The negative binomial regression was used to estimate  
183 the effect of sex, gender, year of occurrence and season of the year on the incidence  
184 of human leptospirosis over the study period. This is a suitable regression model to  
185 use instead of the traditional Poisson regression in situations where modelling involves  
186 a count variable that is over-dispersed (the mean is less than the variance). The results  
187 were presented as incidence rate ratios (IRR) with 95% confidence intervals (CI). The  
188 cut-off value for statistical significance was 0.05. All statistical analysis was conducted  
189 using R software version 1.2.5033.

## 190 **2.5 Ethical considerations**

191 Ethical approval was obtained from the University of Cape Town Human Research  
192 Ethics Committee (UCT-HREC) (reference number: HREC REF: 303/2021). The  
193 Western Cape Provincial approval was granted by Groote Schuur Hospital Research  
194 Ethics Committee. The approval to use data from NHLS database was given by the  
195 NHLS Academic Affairs and Research office (reference number: PR2118953).

## 196 **3. Results**

### 197 **3.1 Distribution of leptospirosis cases in WCP, 2010-2019**

198 During the 10-year study period (2010-2019), a total of 254 cases of human  
199 leptospirosis were recorded by the National Health Laboratory Services (NHLS)  
200 (**Table 1**Error! Reference source not found.) for persons in the Western Cape  
201 Province, South Africa. Most of the cases reported had their specimen submitted from  
202 healthcare facilities located within the City of Cape Town Metropolitan (S2 Table 1).  
203 The highest number of cases was recorded in 2015 (42 cases, 16.5%) and lowest in  
204 2012 (9 cases, 3.5%). When grouped by month of occurrence, the month of March (30  
205 cases) had the highest number of cases over the 10-year period while September (16  
206 cases) had the lowest number of the cases (**Fig 1**). When grouped into seasons, more  
207 cases were observed in fall season (75 cases), followed by summer, spring, and winter  
208 (64, 62, 53 cases respectively) (**Table 1**). More males were infected than females, with  
209 the males accounting for 173 (68.1%) cases compared to 81 (31.9%) cases who were  
210 females, and the overall male to female ratio was 2.136:1 (**Table 1**). The median age

211 of the observed cases was 37.0 (Inter Quantile Range (IQR) 28.0-48.0) years, with a  
212 mean age of 38.12 years. Overall, 163 cases (64.2 %) were in the 18–44-year-old age  
213 group, 78 cases (30.7%) were in  $\geq 45$ -year-old age group while 13 cases (5.1%) were  
214 in the  $\leq 17$ -year-old age group over the 10-year study period (**Table 1**).

215 **Table 1: Distribution of leptospirosis cases by age, sex, season, and year of**  
 216 **occurrence in Western Cape Province South Africa (2010-2019)**

217

| <b>Variables</b>                | <b>All Cases (n=254)<br/>n (%)</b> |
|---------------------------------|------------------------------------|
| <b>Age (years)</b> median (IQR) | 37.0 (28.0,48.0)                   |
| <b>Age group</b>                |                                    |
| ≤17                             | 13 (5.1)                           |
| 18-44                           | 163 (64.2)                         |
| ≥ 45                            | 78 (30.7)                          |
| <b>Sex</b>                      |                                    |
| Male                            | 173 (68.1)                         |
| Female                          | 81 (31.9)                          |
| <b>Season of the Year</b>       |                                    |
| Summer                          | 64 (25.2)                          |
| Fall                            | 75 (29.5)                          |
| Winter                          | 53 (20.9)                          |
| Spring                          | 62 (24.4)                          |
| <b>Year of occurrence</b>       |                                    |
| 2010                            | 34 (13.4)                          |
| 2011                            | 19 (7.5)                           |
| 2012                            | 9 (3.5)                            |
| 2013                            | 12 (4.7)                           |
| 2014                            | 28 (11.0)                          |
| 2015                            | 42 (16.5)                          |
| 2016                            | 37 (14.6)                          |
| 2017                            | 22 (8.7)                           |
| 2018                            | 31 (12.2)                          |
| 2019                            | 20 (7.9)                           |

218 IQR: Inter Quantile Range; n: frequency.

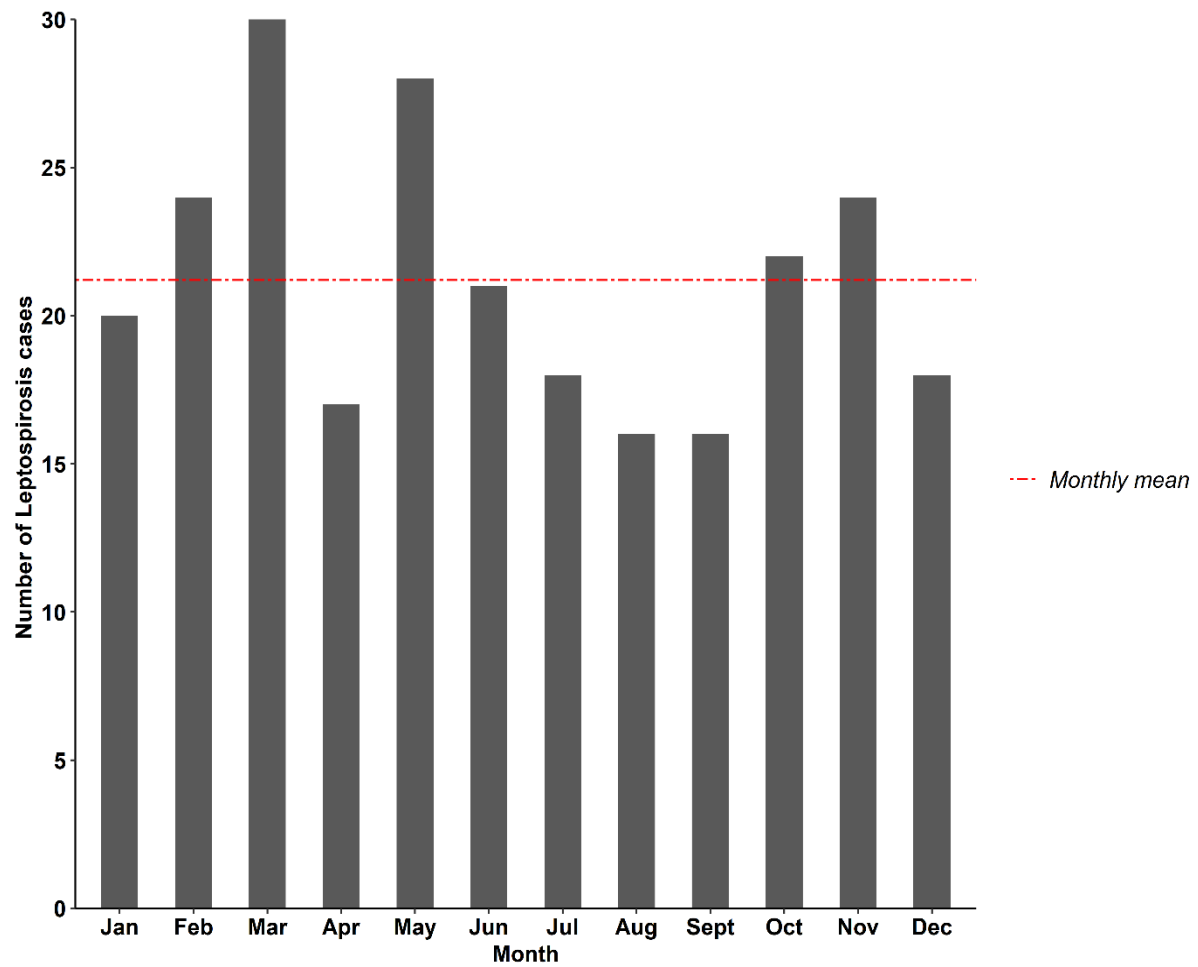

219 **Fig 1: Monthly distribution of leptospirosis cases in Western Cape Province over**  
220 **a 10-year period (2010-2019)**

## 221 **3.2 Incidence of leptospirosis in the WCP, 2010-2019**

222 The incidence of leptospirosis fluctuated widely across the 10 years. The annual  
223 incidence ranged from 0.15 to 0.66 cases per 100,000 population, with an average  
224 annual incidence of 0.40 cases per 100,000 population. The annual number of cases  
225 and the incidence are plotted against the year of occurrence to show the trends across  
226 the years (**Fig 2**). The incidence followed a downward trend between 2010 (0.59 cases  
227 per 100,000 population) and 2012 (0.15 cases per 100,000 population). However,  
228 there was an increase in the incidence from 2013 (0.20 cases per 100,000 population)  
229 which peaked in 2015 (0.66 cases per 100,000 population). This was followed by a  
230 gradual decrease in the incidence between 2015 and 2019 (0.66-0.27 cases per  
231 100,000 population) except for year 2018 where the annual incidence was higher than  
232 the one observed in 2017.

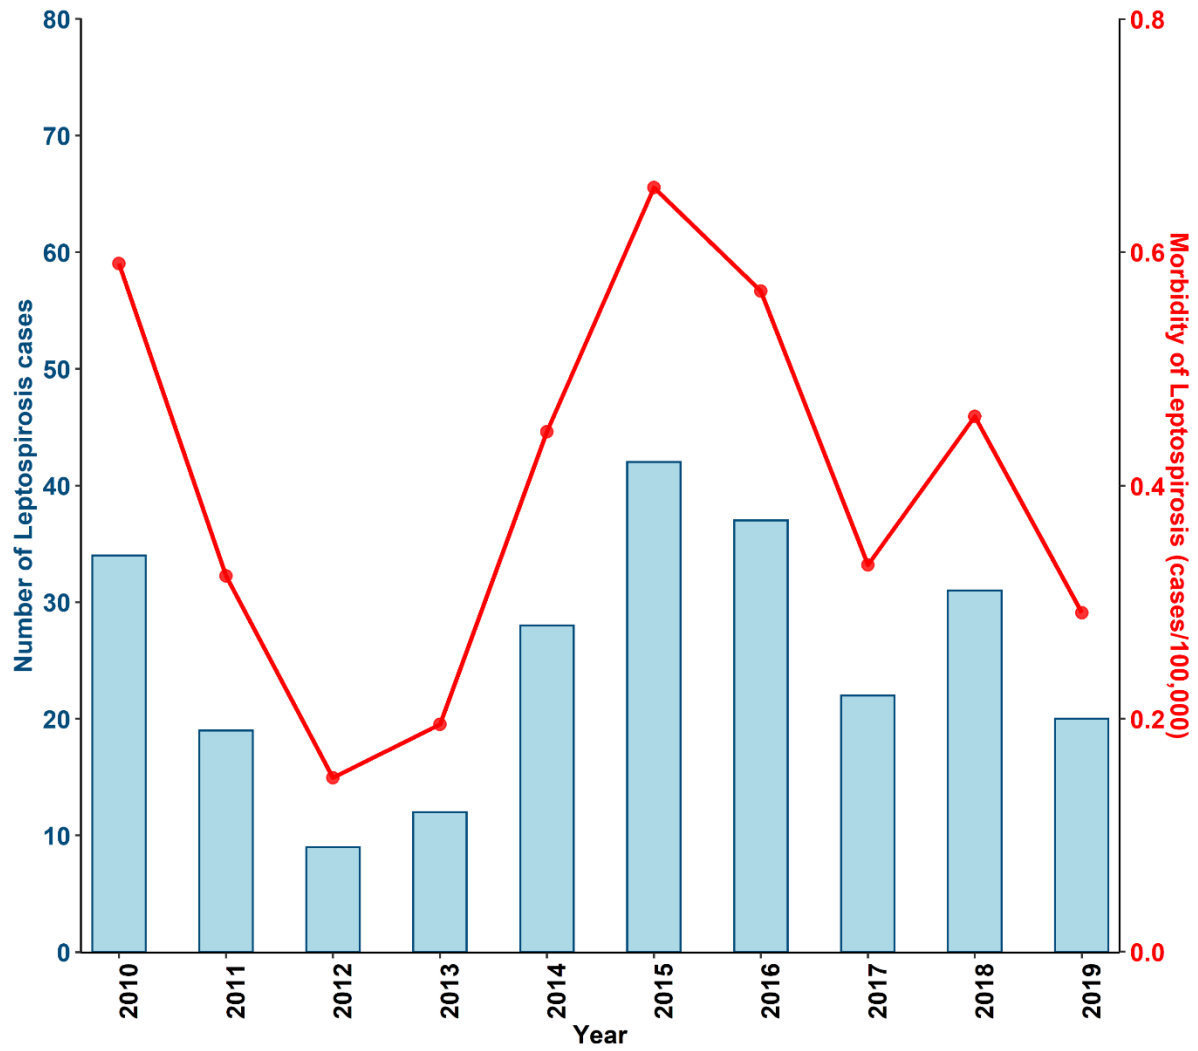

233 Fig 2: The number of cases and incidence of leptospirosis per year (2010 to  
234 2019) in Western Cape Province, South Africa.



235 Throughout the study period, the incidence was highest among males compared to  
236 females (**Fig 3**), with the average incidence among males being 0.55 cases per  
237 100,000 population and 0.25 cases per 100,000 population among females (p-  
238 values=0.004). During the entire study period, the incidence was highest in the 18-44-  
239 year-old and  $\geq 45$  years-old age groups compared to the  $\leq 17$ -year-old age group (**Fig**  
240 **4** and **Error! Reference source not found.**). The average incidence differed  
241 substantially between the age groups with the highest average incidence being among  
242 the 18-44-year-old age group (0.56 cases per 100,000 population) over the 10-year  
243 period, followed by  $\geq 45$  years-old age group (0.49 cases per 100,000 population) and  
244 the  $\leq 17$ -year-old age group had the lowest incidence (0.07 cases per 100,000  
245 population) (**Error! Reference source not found.**).

246 The results indicate that on average, the annual incidence was higher during the fall  
247 season (0.12 cases per 100,000 population) and lowest in the winter season (0.08  
248 cases per 100,000 population) over the 10-year period (**Table 2**). However, the  
249 observed difference in the average incidence of leptospirosis between the seasons of  
250 the year was not statistically significant.

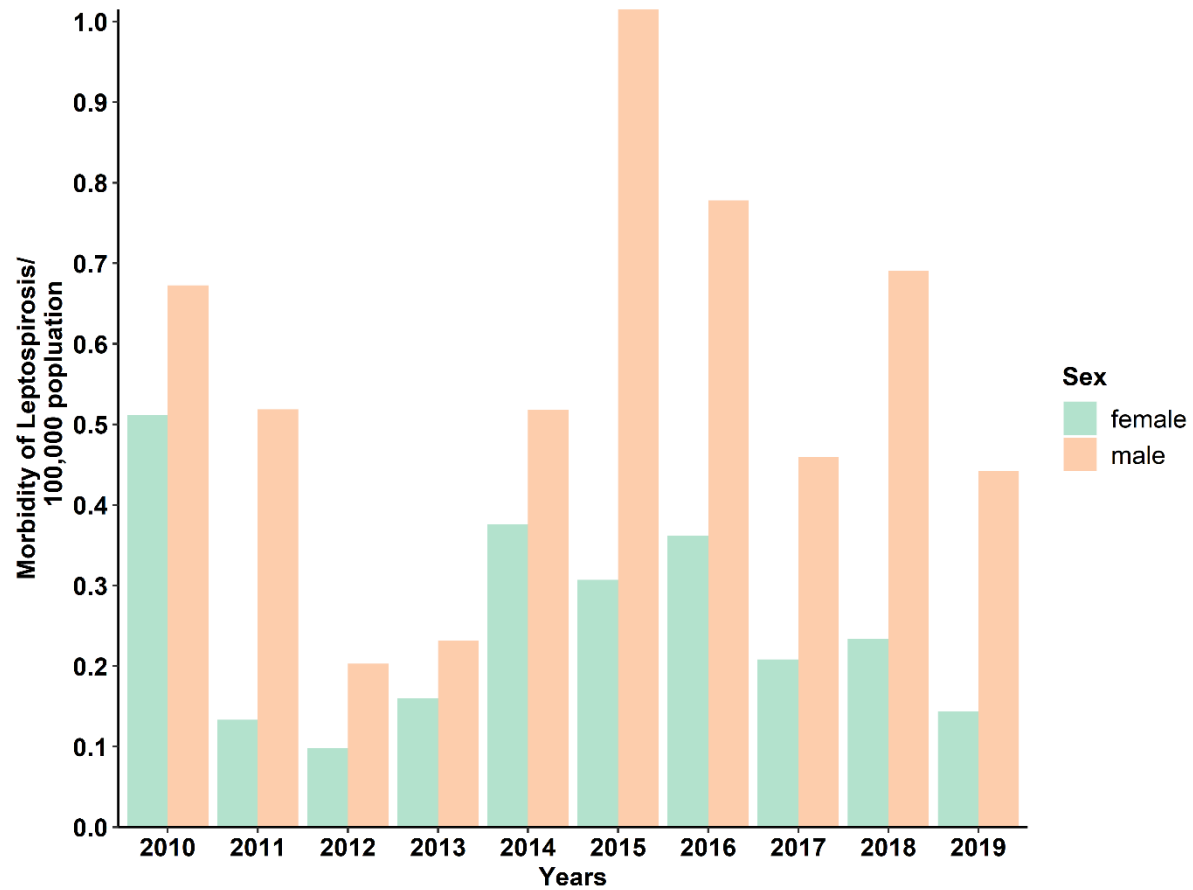

251 **Fig 3: Incidence of leptospirosis in males and females from 2010 to 2019 in**  
252 **Western Cape Province.**

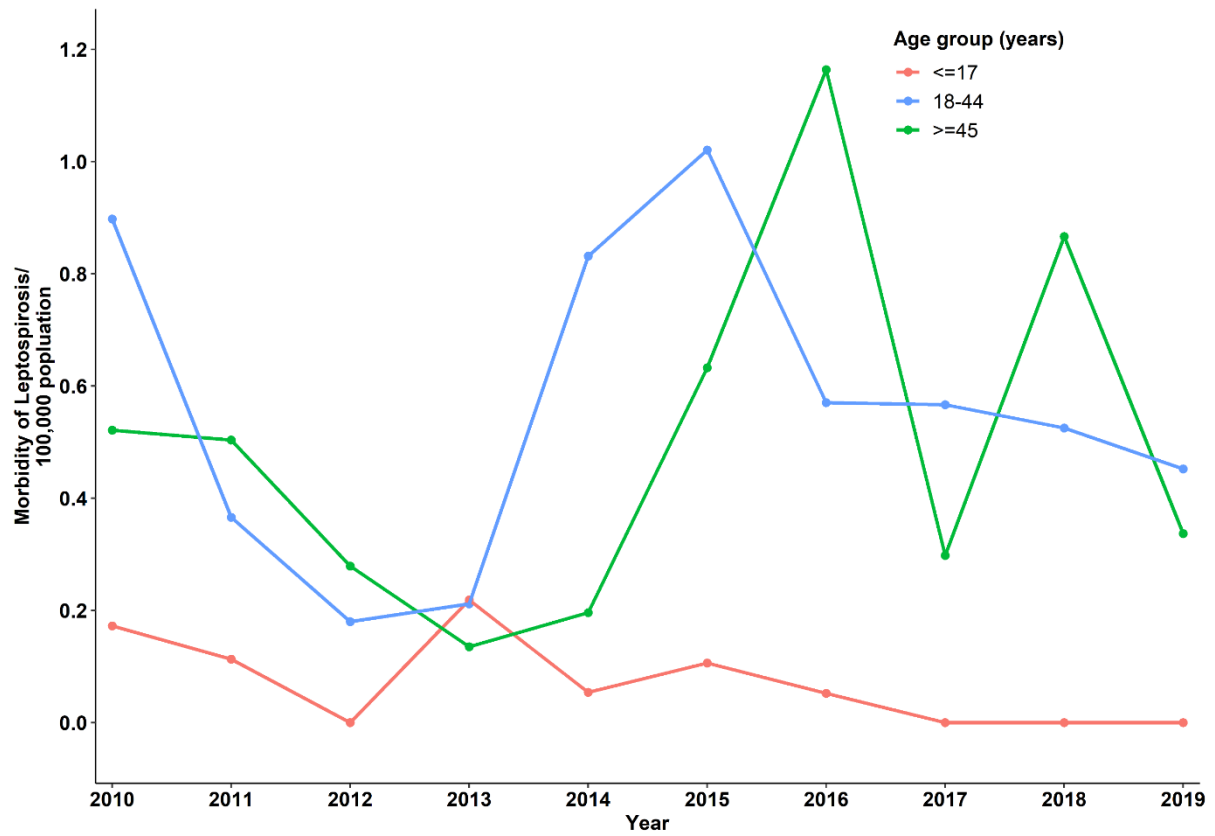

253 **Fig 4: Incidence of leptospirosis by age group from 2010 to 2019 in Western**  
254 **Cape Province, South Africa.**

255 **Table 2: Seasonal incidence of leptospirosis for the years 2010-2019, in Western**  
256 **Cape Province, South Africa.**

| <b>Year</b>              | <b>Summer</b>           | <b>Fall</b>             | <b>Winter</b>           | <b>Spring</b>           |
|--------------------------|-------------------------|-------------------------|-------------------------|-------------------------|
|                          | IP/100,000<br>(95% CI)  | IP/100,000<br>(95% CI)  | IP/100,000<br>(95% CI)  | IP/100,000<br>(95% CI)  |
| 2010                     | 0.10 (0.02,0.19)        | 0.28 (0.14,0.41)        | 0.12 (0.03,0.21)        | 0.09(0.01,0.16)         |
| 2011                     | 0.12 (0.03,0.21)        | 0.03 (-0.01,0.08)       | 0.07 (0.001,0.13)       | 0.10 (0.02,0.18)        |
| 2012                     | 0.07 (0.001,0.13)       | 0.03 (-0.01,0.08)       | 0.02 (-0.02,0.05)       | 0.03 (-0.01,0.08)       |
| 2013                     | 0.05 (-0.01,0.10)       | 0.05 (-0.01,0.10)       | 0.07 (0.001,0.13)       | 0.03 (-0.01,0.08)       |
| 2014                     | 0.02 (-0.01,0.05)       | 0.10 (0.02,0.17)        | 0.14 (0.05,0.24)        | 0.19 (0.08,0.30)        |
| 2015                     | 0.20 (0.09,0.31)        | 0.17 (0.07,0.27)        | 0.16 (0.06,0.25)        | 0.13 (0.04,0.21)        |
| 2016                     | 0.18 (0.08,0.29)        | 0.21 (0.10,0.33)        | 0.03 (-0.01,0.07)       | 0.14 (0.05,0.23)        |
| 2017                     | 0.12 (0.03,0.18)        | 0.09 (0.02,0.16)        | 0.08 (0.01,0.14)        | 0.06 (0.001,0.12)       |
| 2018                     | 0.12 (0.04,0.20)        | 0.15 (0.06,0.24)        | 0.09 (0.02,0.16)        | 0.10 (0.03,0.18)        |
| 2019                     | 0.04(-0.01,0.09)        | 0.07 (0.01,0.14)        | 0.07 (0.01,0.14)        | 0.10 (0.03,0.18)        |
| <b>Average incidence</b> | <b>0.10 (0.03,0.18)</b> | <b>0.12 (0.04,0.20)</b> | <b>0.08 (0.02,0.15)</b> | <b>0.10 (0.02,0.17)</b> |

257 IP: incidence proportion; CI: confidence interval

### 258 **3.3 Effect of sex, age, year, and season on leptospirosis**

#### 259 **incidence in WCP, 2010-2019**

260 **Table 3** shows the results from the Multivariable Negative Binomial Regression  
261 (MNBR) model that was run to identify factors associated with the incidence of  
262 leptospirosis during the 10-year period. The incidence rate of leptospirosis among the  
263 male demographic was 2.2 (95% CI: 1.66,3.03) times higher than among females  
264 during the entire study period. The model results indicated that on average the  
265 incidence rate of leptospirosis among 18-44 and  $\geq 45$  age groups was 8.0 (95% CI:  
266 4.65,15.15) and 7.4 (95% CI: 4.17,14.17) times higher than the incidence rate among  
267  $\leq 17$  years age group. The incidence was substantially lower in 2012 (IRR 0.25; 95%  
268 CI 0.11-0.54), 2013 (IRR 0.34; 95% CI 0.16-0.68), 2017 (IRR 0.53; 0.28-0.98) and  
269 2019 (IRR 0.47; 95% CI 0.24-0.87) compared to the incidence in 2010. From the model  
270 results, the incidence rate in fall, summer and spring seasons was 1.4 (95% CI:  
271 0.95,2.15), 1.2 (95% CI: 0.78,1.81) and 1.2 (95% CI: 0.77,1.78) times higher than what  
272 was observed in winter season, however the observed difference was not statistically  
273 significant.

274 **Table 3: MNBR analysis results between year, season, sex, and age group with**  
275 **incidence of leptospirosis**

| <b>Variables</b>          | <b>IRR</b> | <b>95% CI</b>  | <b>P.value</b>   |
|---------------------------|------------|----------------|------------------|
| <b>Year of occurrence</b> |            |                |                  |
| 2010                      | Ref        | –              | –                |
| 2011                      | 0.543      | (0.281,1.026)  | 0.061            |
| 2012                      | 0.25       | (0.106,0.536)  | <b>0.001</b>     |
| 2013                      | 0.337      | (0.157,0.684)  | <b>0.003</b>     |
| 2014                      | 0.73       | (0.402,1.314)  | 0.294            |
| 2015                      | 1.033      | (0.597,1.796)  | 0.907            |
| 2016                      | 0.956      | (0.546,1.677)  | 0.874            |
| 2017                      | 0.53       | (0.282,0.98)   | <b>0.046</b>     |
| 2018                      | 0.748      | (0.418,1.334)  | 0.323            |
| 2019                      | 0.466      | 0.244,0.872    | <b>0.019</b>     |
| <b>Season of the year</b> |            |                |                  |
| Winter                    | Ref        | –              | –                |
| Spring                    | 1.166      | (0.765,1.782)  | 0.475            |
| Summer                    | 1.184      | (0.778,1.808)  | 0.431            |
| Fall/autumn               | 1.422      | 0.947,2.147    | 0.091            |
| <b>Sex</b>                |            |                |                  |
| Female                    | Ref        | –              | –                |
| Male                      | 2.239      | (1.664,3.034)  | <b>&lt;0.001</b> |
| <b>Age group</b>          |            |                |                  |
| ≤17                       | Ref        | –              | –                |
| 18-44                     | 8.045      | (4.654,15.147) | <b>&lt;0.001</b> |
| ≥45                       | 7.391      | (4.167,14.169) | <b>&lt;0.001</b> |

276 IRR: incidence rate ratio; CI: confidence interval; ref: reference category; MNBR:  
277 Multivariable Negative Binomial Regression.

## 278 4. Discussion

279 This study provides a first description of the incidence of human leptospirosis in the  
280 Western Cape Province (WCP), South Africa across a 10-year period. Here we report  
281 an average incidence of 0.40 leptospirosis cases per 100,000 population, ranging from  
282 0.15 in 2012 to 0.66 in 2015 cases per 100,000. There was no overall increase in the  
283 annual incidence of leptospirosis, however the incidence fluctuated widely across the  
284 10-year period. The incidence was significantly higher in males compared to female.  
285 The 18-44-year-old and  $\geq 45$  years-old age groups had a higher incidence of the  
286 infection compared to the  $\leq 17$ -year-old age group. The incidence did not vary based  
287 on season over the 10-year period.

288 The annual incidence observed during this 10-year period lies within the range of the  
289 incidence that has been reported globally to be occurring in temperate regions (0.1-1  
290 cases per 100,000 population) [34]. The cold wet winters and warm dry summers  
291 might allow transmission and survival of pathogenic *Leptospira* species [21]. WCP is  
292 known for its harsh drought, and different types of floods such as river floods, flash  
293 floods and these occur in each year at varying intensities [35]. Annual fluctuation in  
294 such environmental conditions could partly explain the observed wide fluctuation in  
295 the annual incidence of leptospirosis because increase in incidence is normally  
296 reported after occurrence of extreme weather events such as heavy rains and high  
297 temperatures [29,34,36]. In addition, rodent infestation, increased prevalence of  
298 infected rodents and overcrowded settings were reported as risk factors for human  
299 leptospirosis outbreak in a one of the prisons in WCP in 2015 [22]. This outbreak could  
300 have contributed to the observed increase in the incidence in 2015. In a study

301 conducted after this outbreak, Naidoo et al. further highlighted the importance of  
302 continued circulation of pathogenic *leptospira spp* among rodents in maintaining the  
303 status of leptospirosis transmission particularly in informal settlements [22].

304 Previous studies have indicated a significant relationship between leptospirosis  
305 incidence and seasonality [34,36,37]. In Western Cape, seasonality was not  
306 associated with the incidence of leptospirosis between 2010 and 2019, however the  
307 incidence was slightly higher in fall and summer as compared to winter and spring.  
308 This is consistent with some reports from other countries in temperate regions [34,38].  
309 Studies on correlation between leptospirosis incidence and seasonality require  
310 consideration of other variables such as rodent seasonal population, temperature,  
311 rainfall, and other climate related parameters to be included in the analysis [37]. This  
312 could help in understanding the importance of the interaction of different environmental  
313 and climatic factors in determining the incidence of leptospirosis in resource limited  
314 settings.

315 The results showed that the overall incidence was significantly higher in males as  
316 compared to females (0.55 cases vs 0.25 cases per 100,000 population) during the  
317 study period. Similar results have been reported in both seroprevalence studies in  
318 Africa and in incidence studies conducted using surveillance data globally  
319 [26,27,34,38,39]. The higher incidence among males has been largely attributed to  
320 occupational or environmental exposure, whereby males engage in activities that may  
321 put them at higher risk of contracting the infection [36,40]. Epidemiological studies  
322 collecting data on occupation, underlying medical conditions, and place of settlement



323 could aid in categorically establishing risk groups hence guiding policies on targeted  
324 prevention of leptospirosis.

325 The incidence of leptospirosis was highest among those within the 18-44 and  $\geq 45$  -  
326 year-old age groups compared to those below  $\leq 17$  years of age. These findings are in  
327 line with a systematic review by Costa et al. that reported the highest incidence to be  
328 occurring among adult males aged 20-49 years [5]. The observed results also  
329 correspond with other studies, where incidence has been shown to be higher among  
330 the active adult population [34,38]. People belonging to the 18-44 and  $\geq 45$  age groups  
331 would theoretically have an increased environmental exposure compared to those  
332 belonging to  $\leq 17$  age group, thus increasing their risk of being infected.

333 The data presented here are the first results to inform on the incidence trends and  
334 distribution of leptospirosis in WCP. The data covers a 10-year period, hence could  
335 help to guide designing of preventive strategies. However, there are some study  
336 limitations that need to be considered. Firstly, the study utilized data collected from  
337 passive surveillance and from a public health laboratory setting excluding data from  
338 private laboratories, hence there is a great potential for underestimation of the real  
339 occurrence of leptospirosis in WCP. Some bias may still be inherent in the analysis  
340 due to ambiguity in clinical presentation; the latter contributes to underestimation of  
341 actual incidence. Secondly, the analysis does not provide information on the  
342 geographical distribution of the cases within the province as such information was not  
343 included in provided data. Consideration of the geographical distribution of the  
344 incidence would have given insights into which specific districts are at risk, hence  
345 informing targeted interventions.

346 Findings from this analysis highlight the continued circulation of leptospirosis infection  
347 within WCP with age and sex being significant risk factors for infection. However, there  
348 is need of a good knowledge about the epidemiology of leptospirosis (such as the  
349 geographical and seasonal patterns, the specific risk populations, circulating  
350 *Leptospira* strains and the importance of reservoir animals) [13] within the province to  
351 improve prevention strategies, prediction, and detection of leptospirosis burden and  
352 outbreaks. For instance, future studies focusing on the impact of heavy rainfall, floods,  
353 seasonal fluctuation in weather-related factors, occupation, geographical location, and  
354 rodent dynamic parameters on leptospirosis incidence could help address the  
355 knowledge gaps on the actual burden of this emerging zoonosis.

356 In conclusion, the incidence of leptospirosis in WCP fluctuated within the range that  
357 has been reported to be occurring in temperate regions. The incidence was strongly  
358 related to sex and age; however, it did not differ across the seasons of the year. These  
359 results show that leptospirosis is an important zoonosis within the province and  
360 potentially disproportionately affecting males and the productive age demographic  
361 groups. The findings, therefore, can guide targeted intervention strategies within the  
362 province to decrease the burden of human leptospirosis.

## 363 **5. Acknowledgement**

364 Special thanks to the National Health Laboratory Services (NHLS), South Africa for  
365 providing all the necessary data on leptospirosis tests conducted in Western Cape  
366 Province.

## 367 6. References

- 368 [1] Bharti AR, Nally JE, Ricaldi JN, Matthias MA, Diaz MM, Lovett MA, et al.  
369 Leptospirosis: A zoonotic disease of global importance. *Lancet Infectious*  
370 *Diseases* 2003;3:757–71. [https://doi.org/10.1016/S1473-3099\(03\)00830-2](https://doi.org/10.1016/S1473-3099(03)00830-2).
- 371 [2] Pappas G, Papadimitriou P, Siozopoulou V, Christou L, Akritidis N. The  
372 globalization of leptospirosis: worldwide incidence trends. *International Journal*  
373 *of Infectious Diseases* 2008;12:351–7.  
374 <https://doi.org/10.1016/j.ijid.2007.09.011>.
- 375 [3] World Health Organisation. Human leptospirosis guidelines for Diagnosis,  
376 Surveillance, and Control. International Leptospirosis Society Geneva 2003.  
377 Available from: <https://apps.who.int/iris/handle/10665/42667> (accessed  
378 November 11, 2021).
- 379 [4] Cosson J-F, Picardeau M, Mielcarek M, Tatarski C, Chaval Y, Suputtamongkol  
380 Y, et al. Epidemiology of *Leptospira* Transmitted by Rodents in Southeast  
381 Asia. *PLoS Neglected Tropical Diseases* 2014;8:e2902.  
382 <https://doi.org/10.1371/journal.pntd.0002902>.
- 383 [5] Costa F, Hagan JE, Calcagno J, Kane M, Torgerson P, Martinez-Silveira MS,  
384 et al. Global Morbidity and Mortality of Leptospirosis: A Systematic Review.  
385 *PLoS Neglected Tropical Diseases* 2015;9.  
386 <https://doi.org/10.1371/journal.pntd.0003898>.
- 387 [6] Caimi K, Ruybal P. *Leptospira* spp., a genus in the stage of diversity and  
388 genomic data expansion. *Infection, Genetics and Evolution : Journal of*

- 389 Molecular Epidemiology and Evolutionary Genetics in Infectious Diseases  
390 2020;81. <https://doi.org/10.1016/J.MEEGID.2020.104241>.
- 391 [7] Haake DA, Levett PN. Leptospirosis in Humans, 2015.  
392 [https://doi.org/10.1007/978-3-662-45059-8\\_5](https://doi.org/10.1007/978-3-662-45059-8_5).
- 393 [8] Gouveia EL, Metcalfe J, de Carvalho ALF, Aires TSF, Villasboas-Bisneto JC,  
394 Queirroz A, et al. Leptospirosis-associated Severe Pulmonary Hemorrhagic  
395 Syndrome, Salvador, Brazil. Emerging Infectious Diseases 2008;14.  
396 <https://doi.org/10.3201/eid1403.071064>.
- 397 [9] Papa A, Theoharidou D, Antoniadis A. Pulmonary Involvement and  
398 Leptospirosis, Greece. Emerging Infectious Diseases 2009;15.  
399 <https://doi.org/10.3201/eid1505.080270>.
- 400 [10] Lameire NH, Bagga A, Cruz D, de Maeseneer J, Endre Z, Kellum JA, et al.  
401 Acute kidney injury: an increasing global concern. The Lancet 2013;382.  
402 [https://doi.org/10.1016/S0140-6736\(13\)60647-9](https://doi.org/10.1016/S0140-6736(13)60647-9).
- 403 [11] Clem A, Izurieta R, Galwankar S. Leptospirosis: The “mysterious” mimic.  
404 Journal of Emergencies, Trauma and Shock 2008;1:21.  
405 <https://doi.org/10.4103/0974-2700.40573>.
- 406 [12] Crump JA, Morrissey AB, Nicholson WL, Massung RF, Stoddard RA, Galloway  
407 RL, et al. Etiology of Severe Non-malaria Febrile Illness in Northern Tanzania:  
408 A Prospective Cohort Study. PLoS Neglected Tropical Diseases 2013;7.  
409 <https://doi.org/10.1371/journal.pntd.0002324>.

- 410 [13] Goarant C. Leptospirosis: risk factors and management challenges in  
411 developing countries. *Research and Reports in Tropical Medicine* 2016;7:49.  
412 <https://doi.org/10.2147/RRTM.S102543>.
- 413 [14] Levett PN. Leptospirosis. *Clinical Microbiology Reviews* 2001;14:296–326.  
414 <https://doi.org/10.1128/CMR.14.2.296-326.2001>.
- 415 [15] Allan KJ, Biggs HM, Halliday JEB, Kazwala RR, Maro VP, Cleaveland S, et al.  
416 Epidemiology of Leptospirosis in Africa: A Systematic Review of a Neglected  
417 Zoonosis and a Paradigm for ‘One Health’ in Africa. *PLoS Neglected Tropical*  
418 *Diseases* 2015;9. <https://doi.org/10.1371/journal.pntd.0003899>.
- 419 [16] Davis CP. Leptospirosis Vaccine, Symptoms, Treatment & Diagnosis 2021.  
420 <https://www.medicinenet.com/leptospirosis/article.htm> (accessed January 25,  
421 2021).
- 422 [17] Levett PN. Leptospirosis: A forgotten zoonosis? *Clinical and Applied*  
423 *Immunology Reviews* 2004;4. <https://doi.org/10.1016/j.cair.2004.08.001>.
- 424 [18] Musso D, la Scola B. Laboratory diagnosis of leptospirosis: A challenge.  
425 *Journal of Microbiology, Immunology and Infection* 2013;46:245–52.  
426 <https://doi.org/10.1016/j.jmii.2013.03.001>.
- 427 [19] Monahan AM, Miller IS, Nally JE. Leptospirosis: risks during recreational  
428 activities. *Journal of Applied Microbiology* 2009;107:707–16.  
429 <https://doi.org/10.1111/J.1365-2672.2009.04220.X>.
- 430 [20] de Vries SG, Visser BJ, Nagel IM, Goris MGA, Hartskeerl RA, Grobusch MP.  
431 Leptospirosis in Sub-Saharan Africa: A systematic review. *International*

- 432 Journal of Infectious Diseases 2014;28:e47–64.  
433 <https://doi.org/10.1016/j.ijid.2014.06.013>.
- 434 [21] Moseley M, Naidoo K, Bastos A, Retief L, Frean J, Telfer S, et al. Multi-locus  
435 sequence analyses reveal a clonal *L. borgpetersenii* genotype in a  
436 heterogeneous invasive *Rattus* spp. community across the City of  
437 Johannesburg, South Africa. *Parasites & Vectors* 2020 13:1 2020;13:1–9.  
438 <https://doi.org/10.1186/S13071-020-04444-0>.
- 439 [22] Naidoo K, Moseley M, McCarthy K, Chingonzoh R, Lawrence C, Setshedi GM,  
440 et al. Fatal rodentborne leptospirosis in prison inmates, South Africa, 2015.  
441 *Emerging Infectious Diseases* 2020;26:1033–55.  
442 <https://doi.org/10.3201/eid2605.191132>.
- 443 [23] Saif A, Frean J, Rossouw J, Trataris AN. Leptospirosis in South Africa.  
444 *Onderstepoort Journal of Veterinary Research* 2012;79.  
445 <https://doi.org/10.4102/ojvr.v79i2.478>.
- 446 [24] Mteshana Z. Epidemiology of leptospirosis in Groote Schuur Hospital  
447 [dissertation]. 2020.
- 448 [25] Dhewantara PW, Mamun A al, Zhang WY, Yin WW, Ding F, Guo D, et al.  
449 Geographical and temporal distribution of the residual clusters of human  
450 leptospirosis in China, 2005–2016. *Scientific Reports* 2018;8.  
451 <https://doi.org/10.1038/s41598-018-35074-3>.
- 452 [26] Benacer D, Thong KL, Min NC, Verasahib K bin, Galloway RL, Hartskeerl RA,  
453 et al. Epidemiology of human leptospirosis in Malaysia, 2004-2012. *Acta  
454 Tropica* 2016;157:162–8. <https://doi.org/10.1016/j.actatropica.2016.01.031>.

- 455 [27] Vieira ML, Gama-Simões MJ, Collares-Pereira M. Human leptospirosis in  
456 Portugal: a retrospective study of eighteen years. *International Journal of*  
457 *Infectious Diseases* 2006;10:378–86. <https://doi.org/10.1016/j.ijid.2005.07.006>.
- 458 [28] Durski KN, Jancloes M, Chowdhary T, Bertherat E. A global, multi-disciplinary,  
459 multi-sectorial initiative to combat leptospirosis: Global Leptospirosis  
460 Environmental Action Network (GLEAN). *International Journal of*  
461 *Environmental Research and Public Health* 2014;11:6000–8.  
462 <https://doi.org/10.3390/ijerph110606000>.
- 463 [29] Lau CL, Smythe LD, Craig SB, Weinstein P. Climate change, flooding,  
464 urbanisation and leptospirosis: Fuelling the fire? *Transactions of the Royal*  
465 *Society of Tropical Medicine and Hygiene* 2010;104:631–8.  
466 <https://doi.org/10.1016/j.trstmh.2010.07.002>.
- 467 [30] Munoz-Zanzi C, Groene E, Morawski BM, Bonner K, Costa F, Bertherat E, et  
468 al. A systematic literature review of leptospirosis outbreaks worldwide, 1970-  
469 2012 2020. <https://doi.org/10.26633/RPSP.2020.78>.
- 470 [31] Municipalities of South Africa [Internet]. Western Cape Municipalities. [Cited  
471 2021 Oct 26] 2021. Available from:  
472 <https://municipalities.co.za/provinces/view/9/western-cape>.
- 473 [32] Boulle A, Heekes A, Tiffin N, Smith M, Mutemaringa T, Zinyakatira N, et al.  
474 Data Centre Profile: The Provincial Health Data Centre of the Western Cape  
475 Province, South Africa. *International Journal of Population Data Science*  
476 2019;4. <https://doi.org/10.23889/IJPDS.V4I2.1143>.



- 477 [33] Western Cape DoH. Department of Health, Population Circular H102 of 2020  
478 2020. Available from:  
479 [https://www.westerncape.gov.za/assets/departments/health/h\\_102\\_2020\\_covi](https://www.westerncape.gov.za/assets/departments/health/h_102_2020_covid-19_population_data.pdf)  
480 [d-19\\_population\\_data.pdf](https://www.westerncape.gov.za/assets/departments/health/h_102_2020_covid-19_population_data.pdf).
- 481 [34] Zhang H, Zhang C, Zhu Y, Mehmood K, Liu J, McDonough SP, et al.  
482 Leptospirosis trends in China, 2007–2018: A retrospective observational study.  
483 *Transboundary and Emerging Diseases* 2020;67:1119–28.  
484 <https://doi.org/10.1111/tbed.13437>.
- 485 [35] Holloway Ailsa, Fortune Gillian, Chasi Vimbai. RADAR Western Cape 2010  
486 Risk and Development Annual Review Disaster Mitigation for Sustainable  
487 Livelihoods Programme 2010.
- 488 [36] Mohan ARM, Cumberbatch A, Adesiyun AA, Chadee DD. Epidemiology of  
489 human leptospirosis in Trinidad and Tobago, 1996-2007: A retrospective  
490 study. *Acta Tropica* 2009;112:260–5.  
491 <https://doi.org/10.1016/j.actatropica.2009.08.007>.
- 492 [37] Desvars A, Jégo S, Chiroleu F, Bourhy P, Cardinale E, Michault A. Seasonality  
493 of human leptospirosis in Reunion Island (Indian Ocean) and its association  
494 with meteorological data. *PLoS ONE* 2011;6.  
495 <https://doi.org/10.1371/journal.pone.0020377>.
- 496 [38] Habus J, Persic Z, Spicic S, Vince S, Stritof Z, Milas Z, et al. New trends in  
497 human and animal leptospirosis in Croatia, 2009–2014. *Acta Tropica*  
498 2017;168:1–8. <https://doi.org/10.1016/j.actatropica.2017.01.002>.

- 499 [39] Lau CL, Watson CH, Lowry JH, David MC, Craig SB, Wynwood SJ, et al.  
500 Human Leptospirosis Infection in Fiji: An Eco-epidemiological Approach to  
501 Identifying Risk Factors and Environmental Drivers for Transmission. PLOS  
502 Neglected Tropical Diseases 2016;10.  
503 <https://doi.org/10.1371/journal.pntd.0004405>.
- 504 [40] Puca E, Pipero P, Harxhi A, Abazaj E, Gega A, Puca E, et al. The role of  
505 gender in the prevalence of human leptospirosis in Albania. The Journal of  
506 Infection in Developing Countries 2018;12. <https://doi.org/10.3855/jidc.9805>.

## 507 **7. Supporting information:**

508 S1 Table 1: Summary of leptospirosis incidence distribution by age group from 2010

509 to 2019 in Western Cape Province, South Africa

510 S2 Table 1: Leptospirosis cases per healthcare facility between 2010-2019 in

511 Western Cape Province, South Africa.

512 S3 Fig 1: University of Cape Town – Human Research Ethics Committee approval

513 document.
